# Supplementary material for: Expanding and optimizing 3D bioprinting capabilities using complementary network bioinks
Source: PubMed Central journal article supplement — Sci Adv. 2020 Sep 18;6(38):eabc5529. doi: 10.1126/sciadv.abc5529 (PMC7500929; doi:10.1126/sciadv.abc5529), 2020-09-18
Supplement: abc5529_SM.pdf [file abc5529_SM.pdf]

## Supplementary Materials for

### **Expanding and optimizing 3D bioprinting capabilities using complementary network bioinks**

Liliang Ouyang, James P. K. Armstrong, Yiyang Lin, Jonathan P. Wojciechowski, Charlotte Lee-Reeves, Daniel Hachim, Kun Zhou, Jason A. Burdick, Molly M. Stevens\*

\*Corresponding author. Email: [m.stevens@imperial.ac.uk](mailto:m.stevens@imperial.ac.uk)

Published 18 September 2020, *Sci. Adv.* **6**, eabc5529 (2020)  
DOI: [10.1126/sciadv.abc5529](https://doi.org/10.1126/sciadv.abc5529)

#### **This PDF file includes:**

Figs. S1 to S10  
Table S1

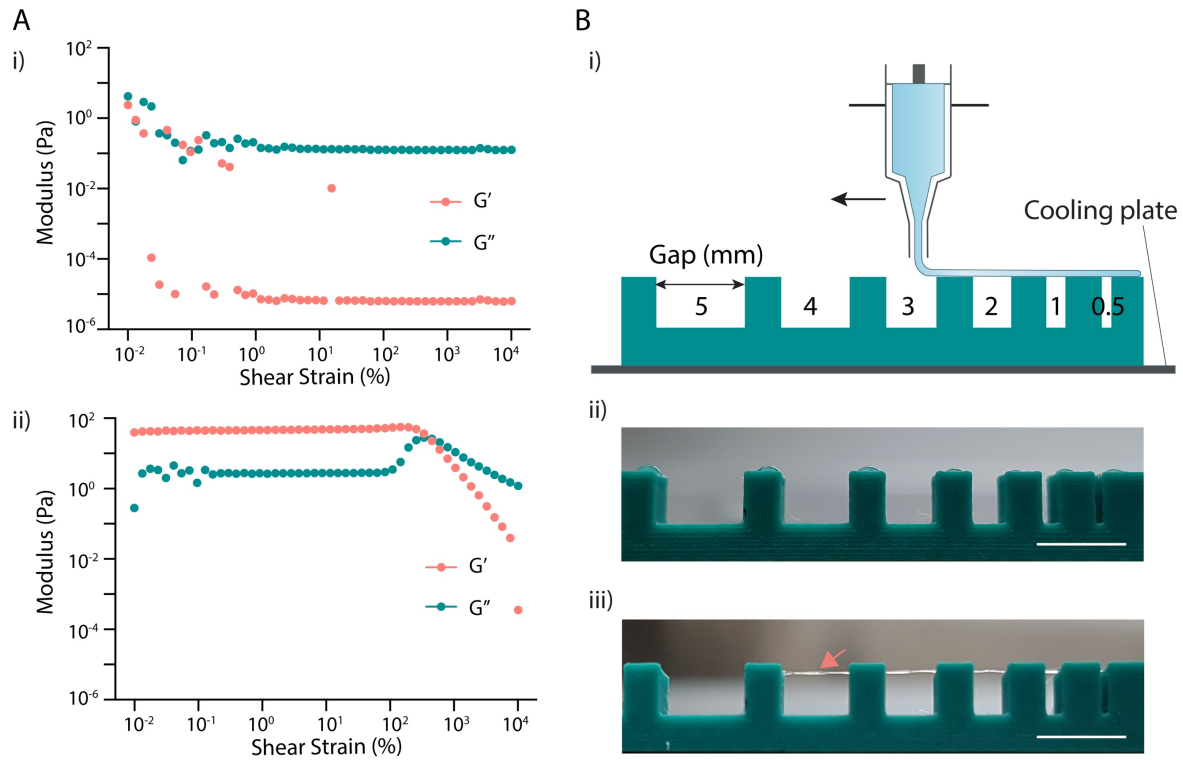

**Figure S1. Printability characterization.** (A) Oscillatory strain sweeps (frequency of 1.5 Hz, temperature of 25 °C) showing typical shear-thinning behavior of (i) 2.5 wt% HAMA<sup>+</sup>, while (ii) HAMA without gelatin was in a liquid phase across the tested strain range. (B) (i) Experimental setup of self-supporting bioink filament formation. Representative optical images for (ii) 2.5 wt% HAMA and (iii) 2.5 wt% HAMA<sup>+</sup> bioinks (arrow indicates filament formation). HAMA failed to bridge the smallest gap (0.5 mm), while HAMA<sup>+</sup> filaments could be used to bridge gaps of up to 4 mm. Printing parameters can be found in Table S1 corresponding to individual bioink. Scale bars: 5 mm. Credit for all photographs in this figure: Liliang Ouyang, Imperial College London.

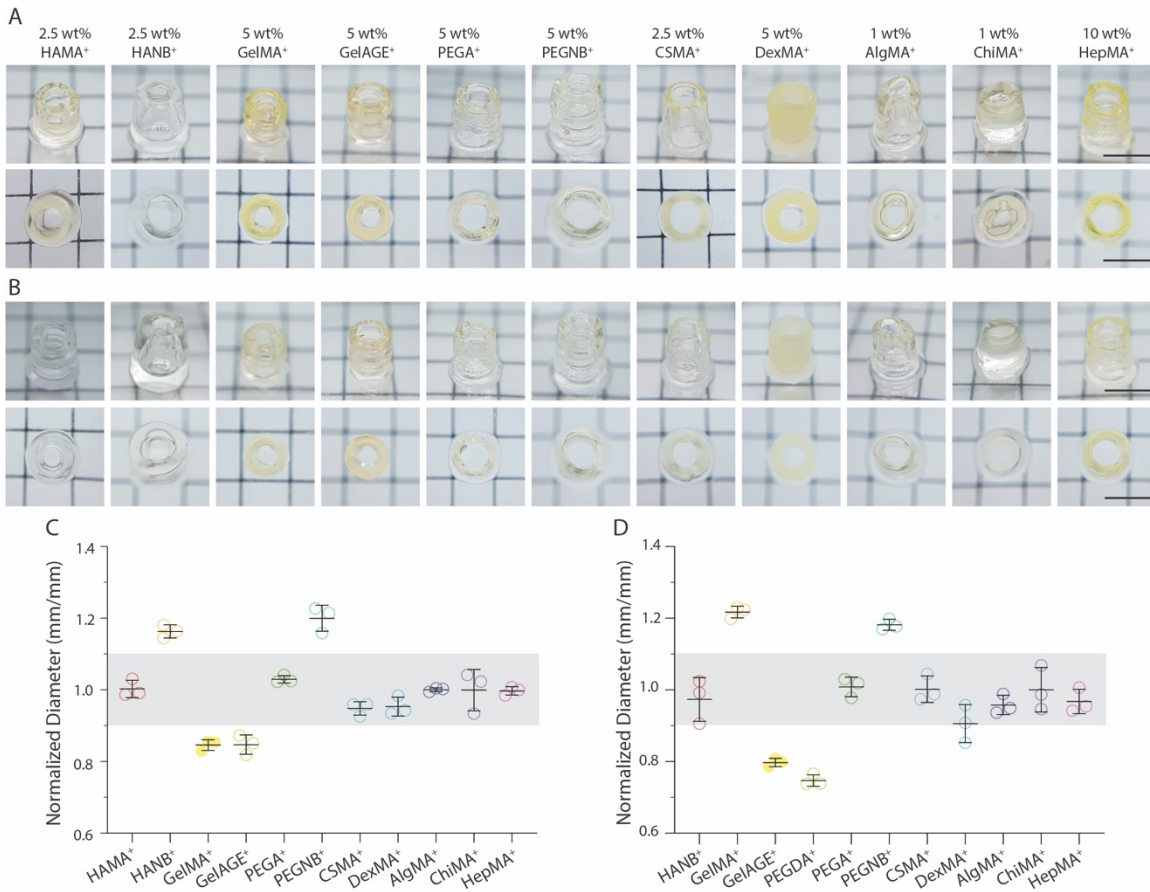

**Fig. S2. Stability of printed constructs.** (A–B) Images of printed tubes and (C–D) corresponding diameter changes 1 d (A, C) and 7 d (B, D) after printing and during incubation at 37 °C (normalized to the values at 0 d). Scale bars: 5 mm. Credit for all photographs in this figure: Liliang Ouyang, Imperial College London.

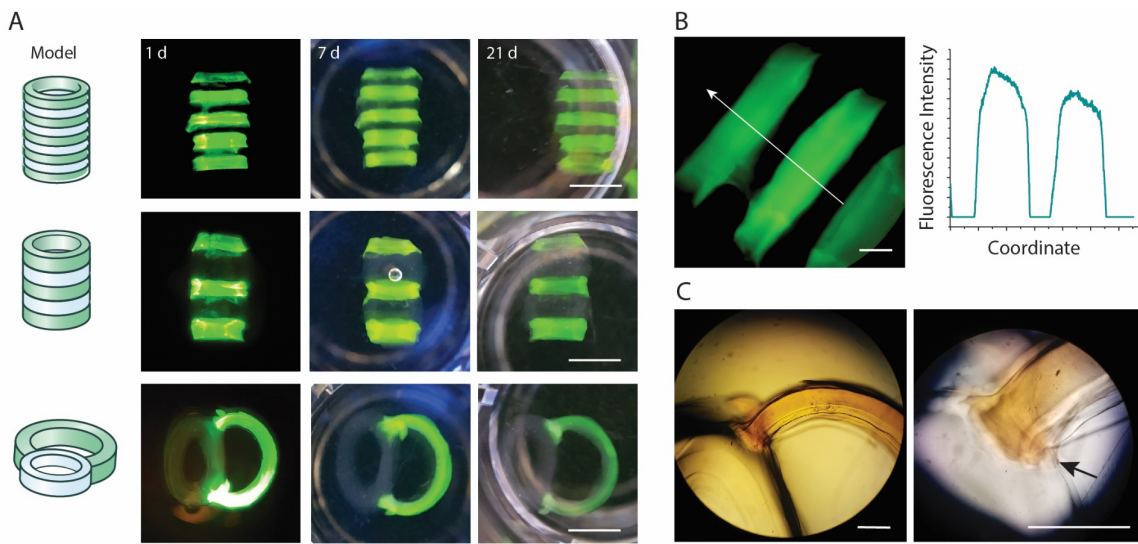

**Fig. S3. Structural heterogeneity.** (A) Photographs of printed heterogeneous constructs (tubular and tracheal-esophageal model) after (1 d, 7 d, 21 d) incubation at 37 °C. 2.5 wt%

HAMA<sup>+</sup> (clear phase) and 5 wt% GelMA<sup>+</sup> (green phase) were printed alternately along the longitudinal or transverse direction. **(B)** Microscopy image of the heterogeneous tube and fluorescence intensity profile along the indicated white line. **(C)** Microscopy images of a tracheal-esophageal construct, indicating the interface between two phases (arrow). Scale bars: 5 mm (A), 1 mm (B–C). Credit for all photographs in this figure: Liliang Ouyang, Imperial College London.

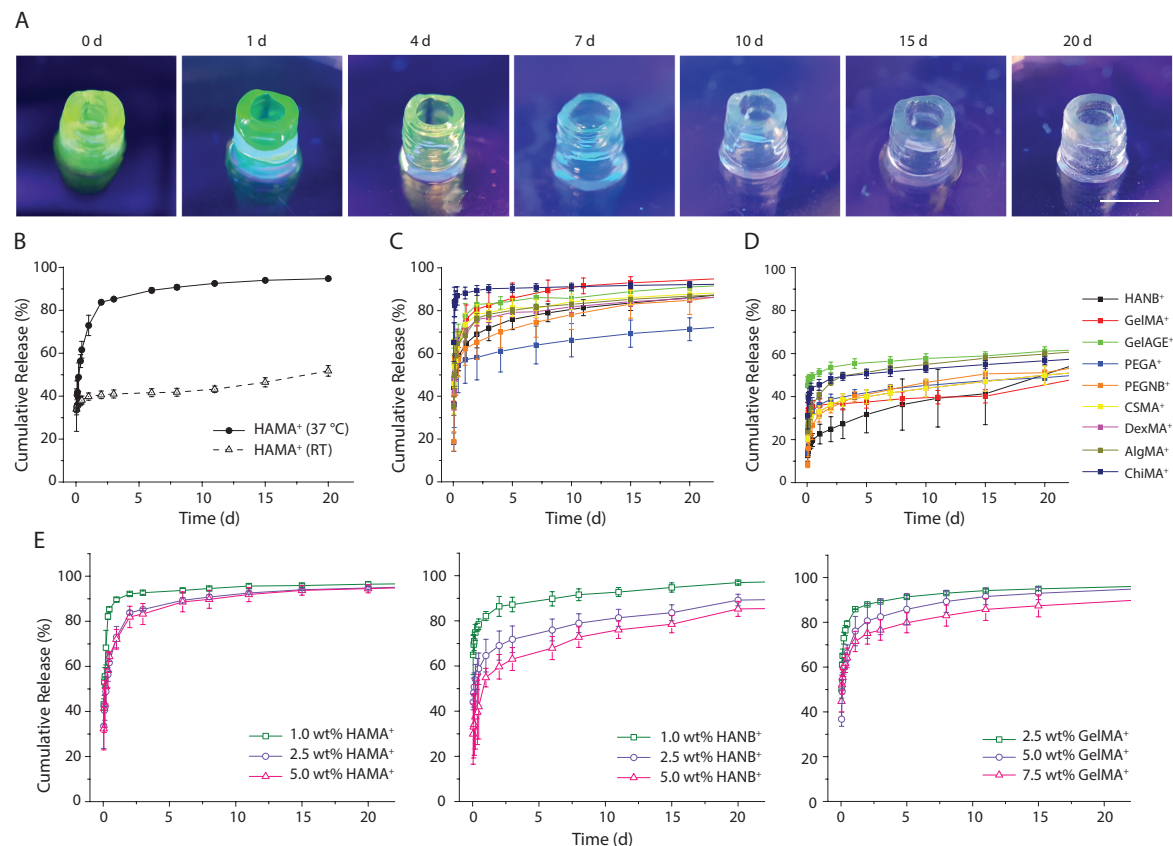

**Fig. S4. Release of gelatin.** **(A)** Representative images of a 3D printed tubular structure (2.5 wt% HAMA<sup>+</sup>) over time during incubation at 37 °C. The green fluorescence indicates the embedded Fluorescein-gelatin. **(B)** Accumulated release of gelatin from 2.5 wt% HAMA<sup>+</sup> hydrogels during incubation at 37 °C or room temperature (RT). Gelatin release profiles in various complementary network hydrogels incubated at **(C)** 37 °C and **(D)** room temperature. **(E)** The influence of photo-crosslinkable polymer concentration (HAMA<sup>+</sup>, HANB<sup>+</sup>, GelMA<sup>+</sup>) on gelatin release. Scale bar: 5 mm. Credit for all photographs in this figure: Liliang Ouyang, Imperial College London.

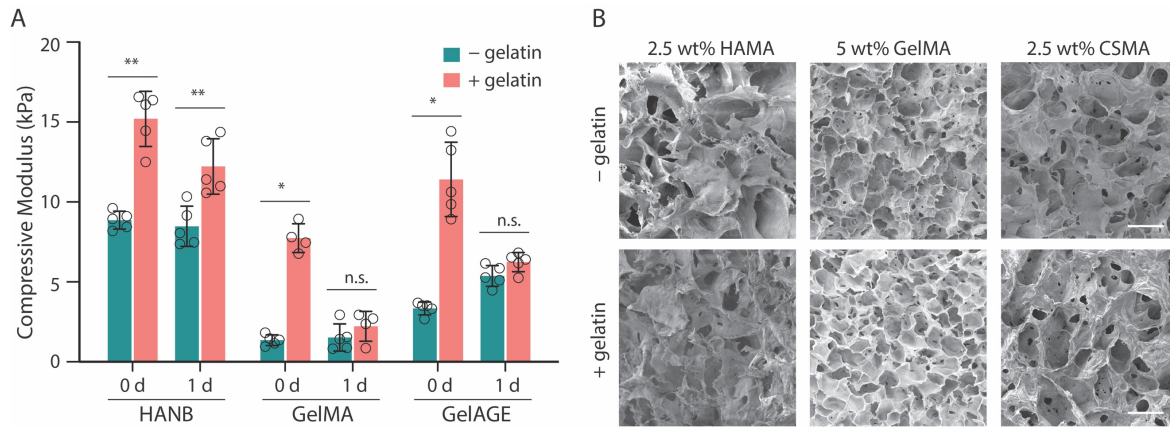

**Fig. S5. Influence of gelatin on mechanical properties and microstructure.** (A) The compressive modulus of HANB, GelMA, and GelAGE hydrogels with or without supplementary 5 wt% gelatin. 0 d and 1 d indicate the conditions before and after 24 h incubation at 37 °C, respectively. Two-tailed Mann–Whitney test, \* $p < 0.05$ , n.s. = not significant ( $n \geq 3$ ). (B) Representative scanning electron micrographs of various hydrogels with or without supplementary 5 wt% gelatin. Hydrogels were analyzed after 24 h incubation followed by freeze-drying. Scale bars: 100  $\mu\text{m}$ .

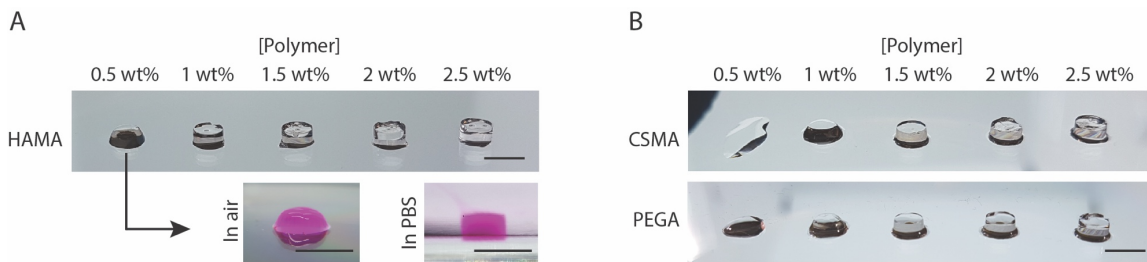

**Fig. S6. Concentration screening for hydrogel formation.** Images of cast cylinder hydrogels (diameter 3.5 mm, height 2 mm) for (A) HAMA, (B) CSMA and PEGA with varied polymer concentrations. All samples were treated with light (365 nm, 10  $\text{mW cm}^{-2}$ ) for 5 min before demolding. Cylindrical 0.5 wt% HAMA hydrogels were stained with dye (magenta) to visualize their geometry in air and PBS. Scale bars: 5 mm. Credit for all photographs in this figure: Liliang Ouyang, Imperial College London.

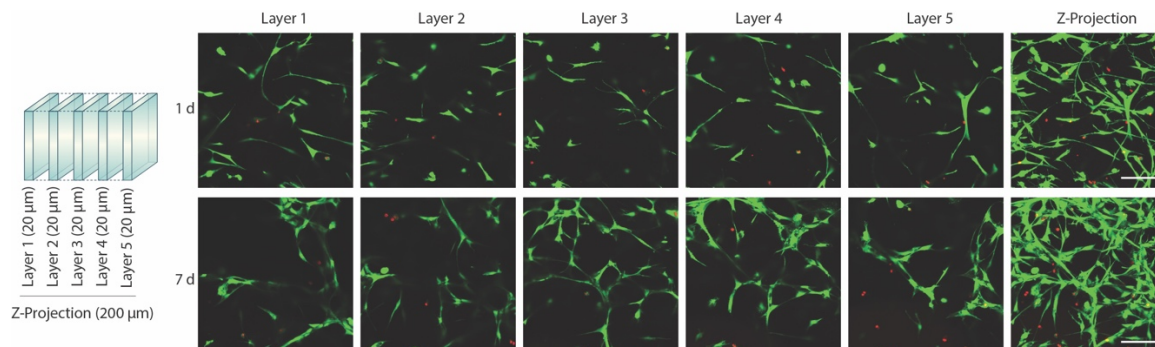

**Fig. S7. Uniformity of cell distribution.** Confocal microscopy z-stack images (green for calcein-AM, red for ethidium homodimer-1) of astrocytes encapsulated in bioprinted constructs at different depths within the hydrogel. Scale bars: 100  $\mu\text{m}$ .

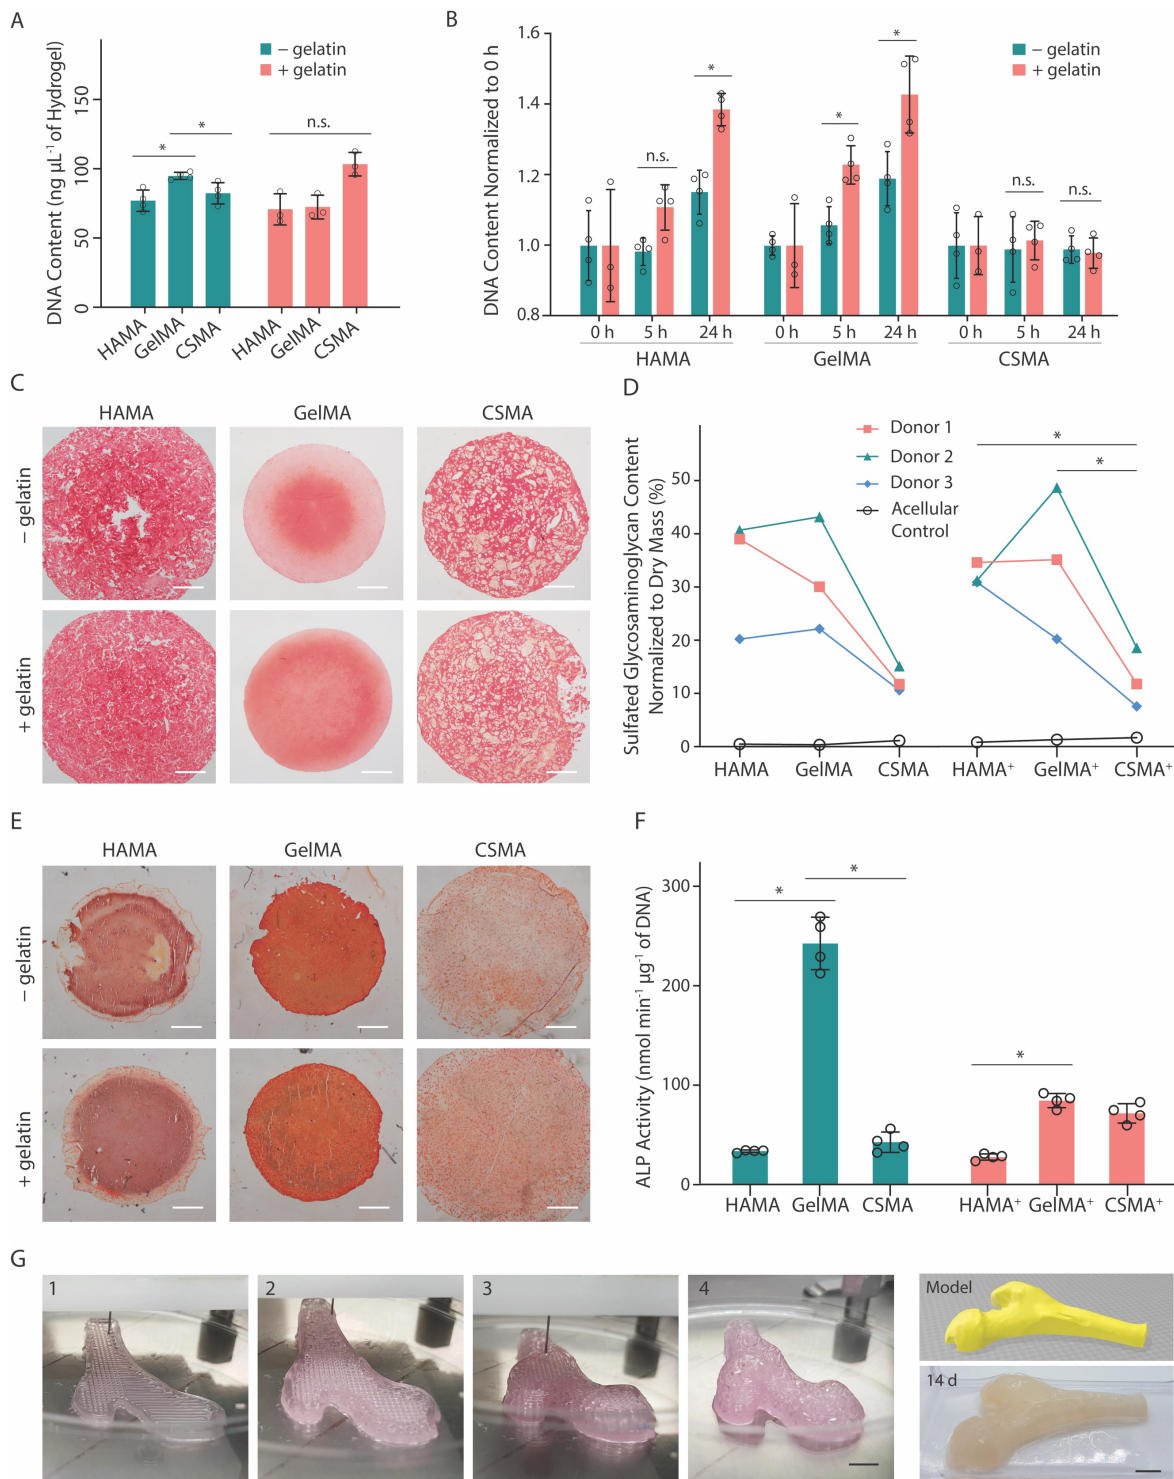

**Fig. S8. Comparison of tissue formation.** (A) DNA quantity at 0 h and (B) fold change in DNA quantity (normalized to 0 h) of Saos-2 laden hydrogels determined by a PicoGreen<sup>TM</sup> assay. Two-tailed Mann–Whitney test, \* $p < 0.05$ , n.s. = not significant ( $n \geq 3$ ). (C) Safranin O staining of cartilage-like construct engineered using chondrocytes encapsulated ( $2.5 \times$

$10^7 \text{ mL}^{-1}$ ) in hydrogels with or without supplementary 5 wt% gelatin after culturing for 42 d. **(D)** The fraction of sulfated glycosaminoglycan (normalized to total dry tissue mass) in cartilage engineered from chondrocyte-laden hydrogels. Tissue constructs were harvested at 42 d and digested, before measuring sulfated glycosaminoglycan content using a DMMB assay. Paired Wilcoxon test,  $*p < 0.05$  (donor number = 3). **(E)** Alizarin Red S staining and **(F)** normalized ALP activity of bone-like construct engineered using Saos-2 cells encapsulated in the same set of hydrogels (initial cell density of  $7.5 \times 10^6 \text{ mL}^{-1}$ ). Analysis was performed after culturing the cellularized hydrogels for 14 d. Two-tailed Mann-Whitney test,  $*p < 0.05$ . **(G)** Bioprinting of a centimeter-sized bone-shaped construct using 5 wt% GelMA<sup>+</sup> bioink encapsulated with Saos-2 cells. Numbers (1-4) on the images indicate the printing process. Scale bars: 500  $\mu\text{m}$  (C, E), 5 mm (G). Credit for all photographs in this figure: Liliang Ouyang, Imperial College London.

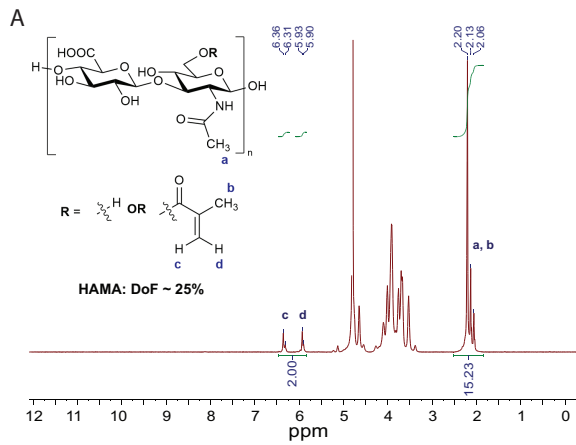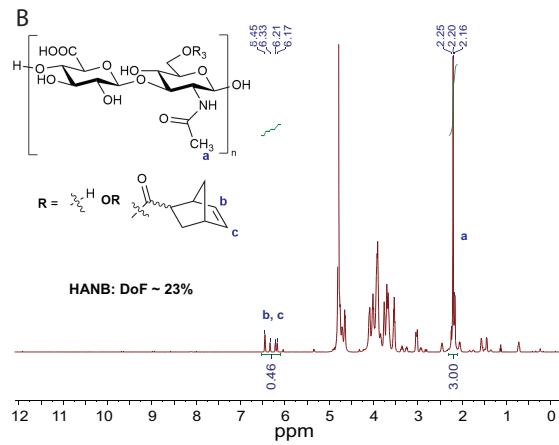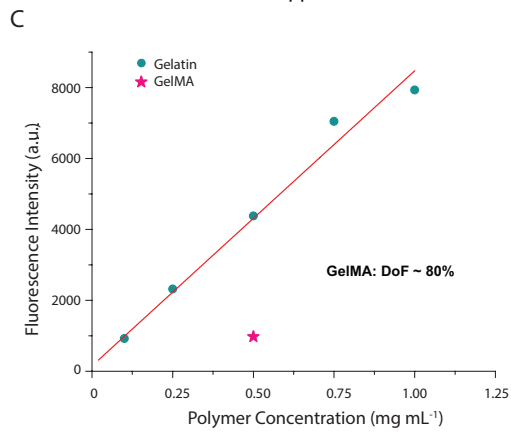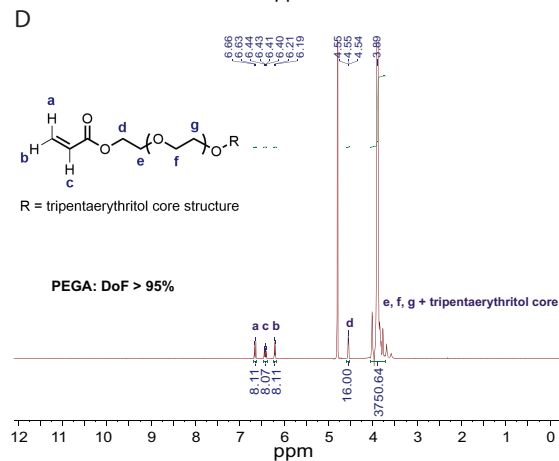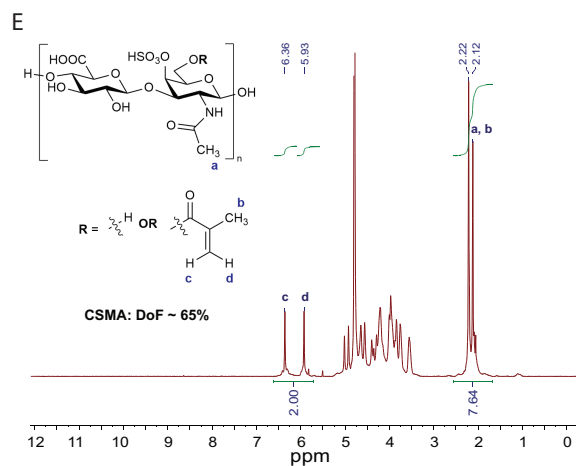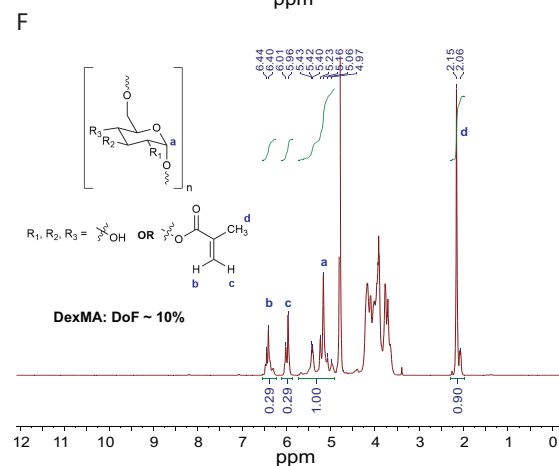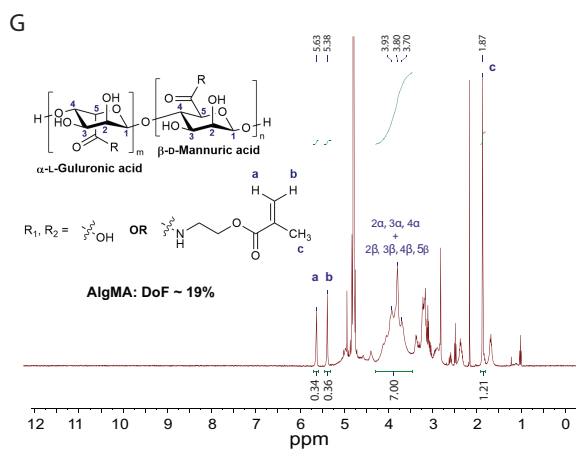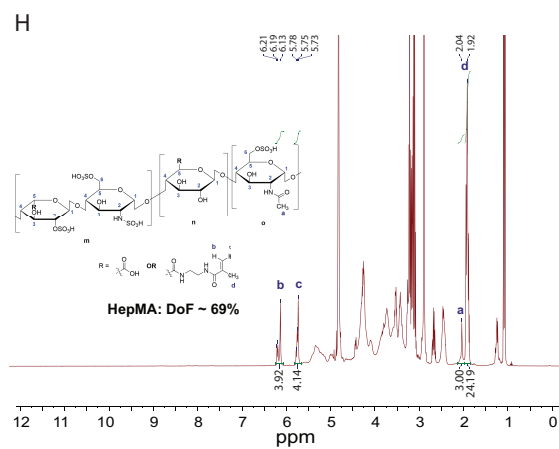



**Fig. S9. Determination of degree of functionalization.** <sup>1</sup>H-NMR spectrum for (A) HAMA, (B) HANB, (D) PEGA, (E) CSMA, (F) DexMA, (G) AlgMA, (H) HepMA and (C) Fluoraldehyde<sup>TM</sup> assay data of GelMA.

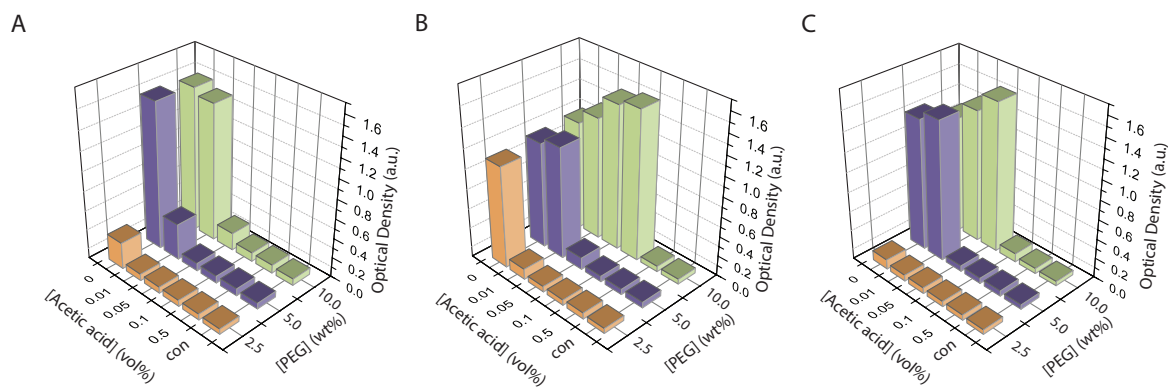

**Fig. S10. Solvent optimization for PEG-based bioinks.** The optical density of (A) PEGDA, (B) PEGA, and (C) PEGNB containing different concentrations of acetic acid (from 0 to 0.5 vol%) and PEG (from 2.5 to 10 wt%). The control (con) indicates a condition free of gelatin and acetic acid. All other conditions are presented with 5 wt% gelatin.

**Table S1. Bioink<sup>TM</sup> composition and examples of printing parameters.**

| Bioink Name    | Bioink Composition   |                 |            |            | Printing Parameters |                     |                          |                                      |
|----------------|----------------------|-----------------|------------|------------|---------------------|---------------------|--------------------------|--------------------------------------|
|                | [Base Polymer] (wt%) | [Gelatin] (wt%) | [LAP] (mM) | [DTT] (mM) | Nozzle Temp. (°C)   | Platform Temp. (°C) | Pneumatic Pressure (bar) | Printing Speed (mm s <sup>-1</sup> ) |
| 2.5 wt% HAMA   | 2.5                  | -               | 2          | -          | 25-26               | 15                  | 0.1-0.2                  | 2-3                                  |
| 2.5 wt% HAMA+  | 2.5                  | 5               | 2          | -          | 25-26               | 15                  | 0.8-1.1                  | 2-3                                  |
| 0.5 wt% HAMA+  | 0.5                  | 5               | 2          | -          | 24-25               | 15                  | 0.4-0.6                  | 2                                    |
| 1 wt% HAMA+    | 1.0                  | 5               | 2          | -          | ~25                 | 15                  | 0.7-0.9                  | 2                                    |
| 5 wt% HAMA+    | 5.0                  | 5               | 2          | -          | 25-26               | 15                  | 0.7-0.9                  | 2                                    |
| 10 wt% HAMA+   | 10.0                 | 5               | 2          | -          | 26-27               | 15                  | 1.6-1.9                  | 2                                    |
| 2.5 wt% GelMA+ | 2.5                  | 5               | 2          | -          | 24-25               | 15                  | 0.5-0.6                  | 1.5-2                                |
| 5 wt% GelMA+   | 5.0                  | 5               | 2          | -          | 26-27               | 15                  | 0.5-0.7                  | 1.5-2.5                              |
| 5 wt% GelAGE+  | 5.0                  | 5               | 2          | 3          | 26-27               | 15                  | 0.6-0.8                  | 2                                    |
| 2.5 wt% HANB+  | 2.5                  | 5               | 2          | 2.31       | 23-24               | 15                  | 0.6-0.7                  | 1.5-2.5                              |
| 5 wt% PEGDA+   | 5.0                  | 5               | 2          | -          | 26-27               | 15                  | 0.8-1.0                  | 2-3                                  |
| 1.5 wt% PEGA+  | 1.5                  | 5               | 2          | -          | 25-26               | 15                  | 0.5-0.7                  | 2-3                                  |

|               |      |   |   |   |       |    |         |     |
|---------------|------|---|---|---|-------|----|---------|-----|
| 2.5 wt% PEGA+ | 2.5  | 5 | 2 | - | 25-26 | 15 | 0.6-0.8 | 2-3 |
| 5 wt% PEGA+   | 5.0  | 5 | 2 | - | 26-27 | 15 | 0.7-0.8 | 2-3 |
| 5 wt% PEGNB+  | 5.0  | 5 | 2 | 4 | 24-25 | 15 | 0.8-0.9 | 2-3 |
| 5 wt% DexMA+  | 5.0  | 5 | 2 | - | 24-25 | 15 | 0.6-0.7 | 2-3 |
| 1.5 wt% CSMA+ | 1.5  | 5 | 2 | - | ~25   | 15 | 0.4-0.6 | 2   |
| 2.5 wt% CSMA+ | 2.5  | 5 | 2 | - | 24-25 | 15 | 0.7-0.8 | 2-3 |
| 1 wt% AlgMA+  | 1.0  | 5 | 2 | - | 25-26 | 15 | 0.7-0.8 | 2   |
| 1 wt% ChiMA+  | 1.0  | 5 | 2 | - | 25-26 | 15 | 0.6-0.9 | 2   |
| 10 wt% HepMA+ | 10.0 | 5 | 2 | - | 24-25 | 15 | 0.8-0.9 | 2   |
